# Supplementary material for: Alien species as a potential threat for Natura 2000 habitats: a national survey
Source: PeerJ. 2019 Nov 11;7:e8032. doi: 10.7717/peerj.8032 (PMC6855207; doi:10.7717/peerj.8032)
Supplement: Data S1 — A number of records of each species within a given habitat type is presented. [file peerj-07-8032-s002.xlsx]

## Sheet: Sheet1
Alien plan species/Habitat code	1150	1210	1230	1330	1340	2110	2120	2130	2140	2160	2170	2180	2190	2330	3110	3130	3140	3150	3160	3220	3230	3240	3260	3270	4030	40A0	5130	6110	6120	6130	6170	6190	6210	6230	6410	6430	6440	6510	6520	65XX	7110	7120	7140	7150	7210	7220	7230	8150	8160
Acer negundo L.								1																6					4				3			9	3	5		1
Acer saccharinum L.
Acorus calamus L.																		6
Aesculus hippocastanum L.																				1						1							2
Ailanthus altissima (Mill.) Swingle
Alnus rugosa (Du Roi) Spreng.													2																														1
Amaranthus chlorostachys Willd.																								7
Amaranthus retroflexus L.																								5													1
Amelanchier spicata (Lam.) K. Koch
Anthoxanthum aristatum Boiss.																													3
Aronia melanocarpa (Michx.) Elliot																																	1					1
Artemisia annua L.														2
Asclepias syriaca L.																													1
Aster lanceolatus Willd.																								2																					1
Aster novae-angliae L.																				1
Aster novi-belgii L.																																				1
Atriplex hortensis L.																								1
Atriplex prostrata Boucher ex DC.																								11
Azolla filiculoides Lam.																1
Bidens frondosa L.																19				2		1	5	64					1						4	1	8			2		1	5
Bidens radiata Thuill.																1
Bryonia alba L.																																			1
Bunias orientalis L.																																	1
Campylopus introflexus (Hedw.)									1										1						5																		3	4
Cerasus mahaleb (L.) Mill.																													1
Chamomilla suaveolens (Pursh) Rydb.																1																1
Chenopodium strictum Roth																								3
Clematis vitalba L.									1																								1
Conyza canadensis (L.) Cronquist			5		2		1	4			1			21		3				6	5	7		13	21		3		35				13	8	4	1	8	29		2				1			1
Corispermum leptopterum (Asch.) Iljin																									1
Cuscuta trifolii Bab. & Gibson																																					1		2
Datura stramonium L.		1																						2													1
Digitalis purpurea L.																																		2		5
Echinocystis lobata (F. Michx.) Torr. & A. Gray		1														1				6	2	3	15	17					1				2			19		1
Elaeagnus commutata Bernh.								1
Elodea canadensis Michx.															7		19	10	1				30																							1
Elodea nuttallii (Planch.) H.St.John	5																	3
Epilobium ciliatum Raf.																1				4															5				6	9			2
Eragrostis albensis H. Scholz																								30
Erechtites hieraciifolia (L.) Raf. ex. DC.																																									1		1
Erigeron annuus (L.) Pers.																1				2	4	1		3	1		1		4				9	1	3	1	3	26	1	2							1
Erigeron ramosus (Walters) Britton, Sterns & Poggenb.																																	1					4
Fraxinus pennsylvanica Marshall
Galinsoga ciliata S. F. Blake																								12
Galinsoga parviflora Cav.																				1	2	1		7													3	1
Geranium pyrenaicum Burm. f																																						1
Helianthus tuberosus L.	1																			1		1	1										1					2
Heracleum mantegazzianum Sommier & Levier
Heracleum sosnowskyi Manden.																				5	3	3	1																	1
Hesperis matronalis L.
Impatiens glandulifera Royle	1																	1		20	5	14	13							2			1			10		1	1	2									1
Impatiens parviflora DC.		1								2		1								8	7	8	17					2	1		1		1			18		1		1						25	1	1
Juglans regia L.																						2				1	1																			1
Juncus tenuis Willd.													3			1																		1					6
Lactuca tatarica (L.) C. A. Mey.		1				1	1
Larix kaempferi (Lamb.) Carriere
Lepidium densiflorum Schrad.																													1
Lonicera caprifolium L.
Lunaria annua L
Lunularia cruciata (L.) Lindb.																				1
Lupinus polyphyllus Lindl.																				4					3			1	4				3	3				7	9	3			1
Lycium barbarum L.																																	1					1
Lycopersicon esculentum Mill.																								9
Mahonia aquifolium (Pursh) Nutt.
Malus domestica Borkh.																													2				1	2				3
Medicago sativa L.																																				1		7		1
Mentha rotundifolia (L.) Huds.				1
Mimulus guttatus DC.																							1													2											1
Myrrhis odorata (L.) Scop.																																	1						1
Onobrychis viciifolia Scop.																																	2
Onopordum acanthium L.																				1
Orthodontium lineare Schwägr.																																										1
Oxalis corniculata L.
Oxalis dillenii Jacq.
Oxalis stricta L.																								2														1	1
Padus serotina (Erhr) Borkh.			2									7		20											21		1	1	17	5			2	23	13	1	1	14		1							1
Parthenocissus inserta (A.Kern.) Fritsch																						4									1		1							1							1
Parthenocissus quinquefolia (L.) Planch.
Pinus banksiana Lamb.												4		1
Pinus nigra Arnold							1		3			11		1													2
Pinus strobus L.												1
Populus "NE 42" .																				2	3
Populus canadensis Moench																																	1
Populus nigra "Italica" L.																																	1
Portulaca oleracea L.																								3
Prunus cerasifera Ehrh.																																						3
Prunus domestica subsp. domestica L.												1
Pseudotsuga menziesii (Mirb.) Franco																														1
Quercus rubra L.												9		2												1	1		1	3			1	2								1	1				1
Reynoutria japonica Houtt.			1																	4	1	4	17							4						4		1	1
Reynoutria sachalinensis (F. Schmidt) Nakai																				1										1						1
Reynoutria x bohemica Chrtek & Chrtkova																							3
Rhus typhina L.
Robinia pseudoacacia L.														3						2		3			2		2		1	3			8	1				1						1
Rosa rugosa Thunb.		6	1	1		5	5	11	3	3	1	2
Rubus laciniatus Willd.
Rudbeckia hirta L.																				1																1
Rudbeckia laciniata L.																				4		1														4
Rumex confertus Willd.		1					1							1										2													15	25
Rumex longifolius DC.																				2																			1				1
Salix acutifolia Willd.		10	1			16	17	5		2				12															8															1
Sedum album L.																										2
Sedum spurium M. Bieb.																												1											1
Senecio vernalis Waldst. & Kit.						1		4																	1
Solidago canadensis L.																1				1		1	1	1				2	3	2			10	3	18	12	1	24		4						1	2
Solidago gigantea Aiton					2					1						1		1		4	5	8	1	18	2		1		3	4			11		15	10	10	22		6	1		1	1	1		1		1
Spiraea tomentosa L.																																											4	6	1
Spiraea x pseudosalicifolia Silverside																																								1
Symphoricarpos albus (L.) S. F. Blake
Syringa vulgaris L.																																	1
Trifolium patens Schreb.																																					1
Veronica filiformis Sm.																				2																			3
Veronica peregrina L.																7
Veronica persica Poir.																								1
Vicia grandiflora Scop.																																						3
Xanthium albinum (Widder) H. Scholz		4														1								35
Xanthium strumarium L.		7				6
[truncated: 17 more columns]
