# Supplementary material for: Alien species as a potential threat for Natura 2000 habitats: a national survey
Source: PeerJ. 2019 Nov 11;7:e8032. doi: 10.7717/peerj.8032 (PMC6855207; doi:10.7717/peerj.8032)
Supplement: Data S2 — The percentage of locations which habitat structure and functions were coded as favorable (SFA_FV), unfavorable inadequate (SFA_U1) and unfavorable bad (SFA_U2) is given. For some locations the habitat structure and functions haven’t been assessed (SFA_unknown). [file peerj-07-8032-s003.xlsx]

## Sheet: Sheet1
Habitat code	Habitat name	SFA_FV	SFA_U1	SFA_U2	SFA_unknown
1150	* Coastal lagoons	21.1538	38.4615	40.3846	0
1210	Annual vegetation of drift lines	8	28	64	0
1230	Vegetated sea cliffs of the Atlantic and Baltic coasts	26.6667	66.6667	6.66667	0
1310	Salicornia and other annuals colonising mud and sand	25	25	50	0
1330	Atlantic salt meadows (Glauco-Puccinellietalia maritimae)	33.3333	11.1111	55.5556	0
1340	* Inland salt meadows	33.3333	33.3333	33.3333	0
2110	Embryonic shifting dunes	25.8065	22.5806	51.6129	0
2120	Shifting dunes along the shoreline with Ammophila arenaria (white dunes)	4.34783	39.1304	56.5217	0
2130	*Fixed coastal dunes with herbaceous vegetation (grey dunes)	0	12.1212	87.8788	0
2140	* Decalcified fixed dunes with Empetrum nigrum	0	14.2857	80.9524	4.7619
2160	Dunes with Hippophae rhamnoides	25	50	25	0
2170	Dunes with Salix repens ssp. argentea (Salicion arenariea)	36.3636	36.3636	27.2727	0
2180	Wooded dunes of the Atlantic, Continental and Boreal region	12.5	54.1667	33.3333	0
2190	Humid dune slacks	52.6316	42.1053	5.26316	0
2330	Inland dunes with open Corynephorus and Agrostis grasslands	28.9474	44.7368	26.3158	0
3110	Oligotrophic waters containing very few minerals of sandy plains (Littorelletalia uniflorae)	40	46.6667	13.3333	0
3130	Oligotrophic to mesotrophic standing waters with vegetation of the Littorelletea uniflorae and/or Isoeto-Nanojuncetea	8.23529	15.2941	34.1176	42.3529
3140	Hard oligo-mesotrophic waters with benthic vegetation of Chara spp.	26.1364	29.5455	44.3182	0
3150	Natural eutrophic lakes with Magnopotamion or Hydrocharition - type vegetation	28.5714	34.1463	37.2822	0
3160	Natural dystrophic lakes and ponds	73.5294	14.7059	8.82353	2.94118
3220	Alpine rivers and the herbaceous vegetation along their banks	18.1818	48.4848	33.3333	0
3230	Alpine rivers and their ligneous vegetation with Myricaria germanica	40	40	20	0
3240	Alpine rivers and their ligneous vegetation with Salix elaeagnos	42.1053	26.3158	31.5789	0
3260	Water courses of plain to montane levels with the Ranunculion fluitantis and Callitricho-Batrachion vegetation	61.9718	26.7606	11.2676	0
3270	Rivers with muddy banks with Chenopodion rubri p.p. and Bidention p.p. vegetation	23.1884	62.3188	14.4928	0
4010	Northern Atlantic wet heaths with Erica tetralix	42.8571	14.2857	42.8571	0
4030	European dry heaths	32.8571	45.7143	21.4286	0
4060	Alpine and Boreal heaths	33.3333	23.8095	42.8571	0
4070	* Bushes with Pinus mugo and Rhododendron hirsutum (Mugo-Rhododendretum hirsuti)	58.3333	8.33333	33.3333	0
4080	Sub-Arctic Salix spp. scrub	60	10	30	0
40A0	* Subcontinental peri-Pannonic scrub	40	13.3333	46.6667	0
5130	Juniperus communis formations on heaths or calcareous grasslands	28.2051	41.0256	30.7692	0
6110	* Rupicolous calcareous or basophilic grasslands of the Alysso-Sedion albi	17.3913	21.7391	60.8696	0
6120	* Xeric sand calcareous grasslands	5.17241	36.2069	53.4483	5.17241
6130	Calaminarian grasslands of the Violetalia calaminariae	31.25	25	37.5	6.25
6150	Siliceous alpine and boreal grasslands	70	30	0	0
6170	Alpine and subalpine calcareous grasslands	70	30	0	0
6190	Rupicolous pannonic grasslands (Stipo-Festucetalia pallentis)	40	40	20	0
6210	Semi-natural dry grasslands and scrubland facies on calcareous substrates(Festuco-Brometalia) ( * important orchid sites)	15.625	54.375	30	0
6230	* Species-rich Nardus grasslands, on siliceous substrates in mountain areas (and submountain areas, in Continental Europe)	20.6897	30.1724	49.1379	0
6410	Molinia meadows on calcareous, peaty or clayey-siltladen soils (Molinion caeruleae)	17.6	51.2	31.2	0
6430	Hydrophilous tall herb fringe communities of plains and of the montane to alpine levels	27.2	49.6	23.2	0
6440	Alluvial meadows of river valleys of the Cnidion dubii	12	26.6667	61.3333	0
6510	Lowland hay meadows (Alopecurus pratensis, Sanguisorba officinalis)	26.5487	39.823	31.2684	2.35988
6520	Mountain hay meadows	32.5	47.5	20	0
65XX	Calthion	28.5714	54.1353	16.5414	0.75188
7110	* Active raised bogs	24.2424	50	25.7576	0
7120	Degraded raised bogs still capable of natural regeneration	11.5385	50	38.4615	0
7140	Transition mires and quaking bogs	28.1879	34.2282	36.2416	1.34228
7150	Depressions on peat substrates of the Rhynchosporion	12.9032	25.8065	58.0645	3.22581
7210	*Calcareous fens with Cladium mariscus and species of the Caricion davallianae	23.3333	26.6667	48.3333	1.66667
7220	* Petrifying springs with tufa formation (Cratoneurion)	11.2903	33.871	41.9355	12.9032
7230	Alkaline fens	8.19672	35.2459	52.459	4.09836
8110	Siliceous scree of the montane to snow levels (Androsacetalia alpinae and Galeopsetalia ladani)	97.5	0	2.5	0
8120	Calcareous and calcshist screes of the montane to alpine levels (Thlaspietea rotundifolii)	80	20	0	0
8150	Medio-European upland siliceous screes	64.2857	28.5714	7.14286	0
8160	* Medio-European calcareous scree of hill and montane levels	37.5	12.5	50	0
8210	Calcareous rocky slopes with chasmophytic vegetation	66.6667	13.8889	19.4444	0
8220	Siliceous rocky slopes with chasmophytic vegetation	50	41.6667	8.33333	0
8230	Siliceous rock with pioneer vegetation of the Sedo-Scleranthion or of the Sedo albi-Veronicion dillenii	33.3333	33.3333	33.3333	0
8310	Caves not open to the public	57.1429	38.0952	4.7619	0
9110	Luzulo-Fagetum beech forests	24.8945	55.2743	19.8312	0
9130	Asperulo-Fagetum beech forests	33.7979	44.9477	21.2544	0
9140	Medio-European subalpine beech woods with Acer and Rumex arifolius	66.6667	26.6667	6.66667	0
9150	Medio-European limestone beech forests of the Cephalanthero-Fagion	44.6429	42.8571	12.5	0
9160	Sub-Atlantic and medio-European oak or oakhornbeam forests of the Carpinion betuli	15.4762	23.8095	60.7143	0
9170	Galio-Carpinetum oak-hornbeam forests	17.9894	41.2698	40.7407	0
9180	* Tilio-Acerion forests of slopes, screes and ravines	78.1955	16.5414	5.26316	0
9190	Old acidophilous oak woods with Quercus robur on sandy plains	6.54206	25.2336	68.2243	0
91D0	* Bog woodland	25.5102	52.551	21.9388	0
91E0	* Alluvial forests with Alnus glutinosa and Fraxinus excelsior (Alno-Padion, Alnion incanae, Salicion albae)	16.7513	51.269	31.9797	0
91F0	Riparian mixed forests of Quercus robur, Ulmus laevis and Ulmus minor, Fraxinus excelsior or Fraxinus angustifolia, along the great rivers (Ulmenion minoris)	5.12821	35.0427	59.8291	0
91I0	* Euro-Siberian steppic woods with Quercus spp.	32.8571	55.7143	11.4286	0
91P0	Holy Cross fir forests (Abietetum polonicum)	45.5556	42.2222	12.2222	0
91Q0	Western Carpathian calcicolous Pinus sylvestris forests	75	25	0	0
91T0	Central European lichen Scots pine forests	22.2222	36.5079	41.2698	0
91XX	Carici elongatae-Alnetum	45.098	34.3137	20.5882	0
9410	Acidophilous Picea forests of the montane to alpine levels (Vaccinio-Piceetea)	35	56.6667	8.33333	0
9420	Alpine Larix decidua and/or Pinus cembra forests	100	0	0	0
